# Supplementary material for: Dysregulated expression of proteins associated with ER stress, autophagy and apoptosis in tissues from nonalcoholic fatty liver disease
Source: PubMed Central journal article supplement (PMC5609929; doi:10.18632/oncotarget.18812), 2017-06-28
Supplement: oncotarget-08-63370-s001.pdf [file oncotarget-08-63370-s001.pdf]

## Dysregulated expression of proteins associated with ER stress, autophagy and apoptosis in tissues from nonalcoholic fatty liver disease

### SUPPLEMENTARY MATERIALS

Supplementary Table 1: Clinical and donor information for the liver tissues used in this study

| Sample # | Diagnosis | Patient ID | Gender  | Age     |
|----------|-----------|------------|---------|---------|
| Normal 1 | Normal    | D486       | Female  | 58      |
| Normal 2 | Normal    | D585       | Male    | 60      |
| Normal 3 | Normal    | D587       | Male    | 49      |
| Normal 4 | Normal    | UC9113     | Female  | 59      |
| NAFL 1   | NAFL      | D218       | Female  | 51      |
| NAFL 2   | NAFL      | UMN1058    | Unknown | Unknown |
| NASH 1   | NASH      | D346       | Female  | 55      |
| NASH 2   | NASH      | D515       | Female  | 56      |
| NASH 3   | NASH      | UMN935     | Female  | 60      |
